# Supplementary material
Source: PubMed Central journal article supplement (PMC5475279)
Supplement: mmc1.pdf [file mmc1.pdf]

**YMTHE, Volume 25**

**Supplemental Information**

**Tracing and Characterizing the Development  
of Transplanted Female Germline Stem Cells  
In Vivo**

**Changqing Wu, Bo Xu, Xiaoyong Li, Wenzhi Ma, Ping Zhang, Xuejin Chen, and Ji Wu**

Supplemental material

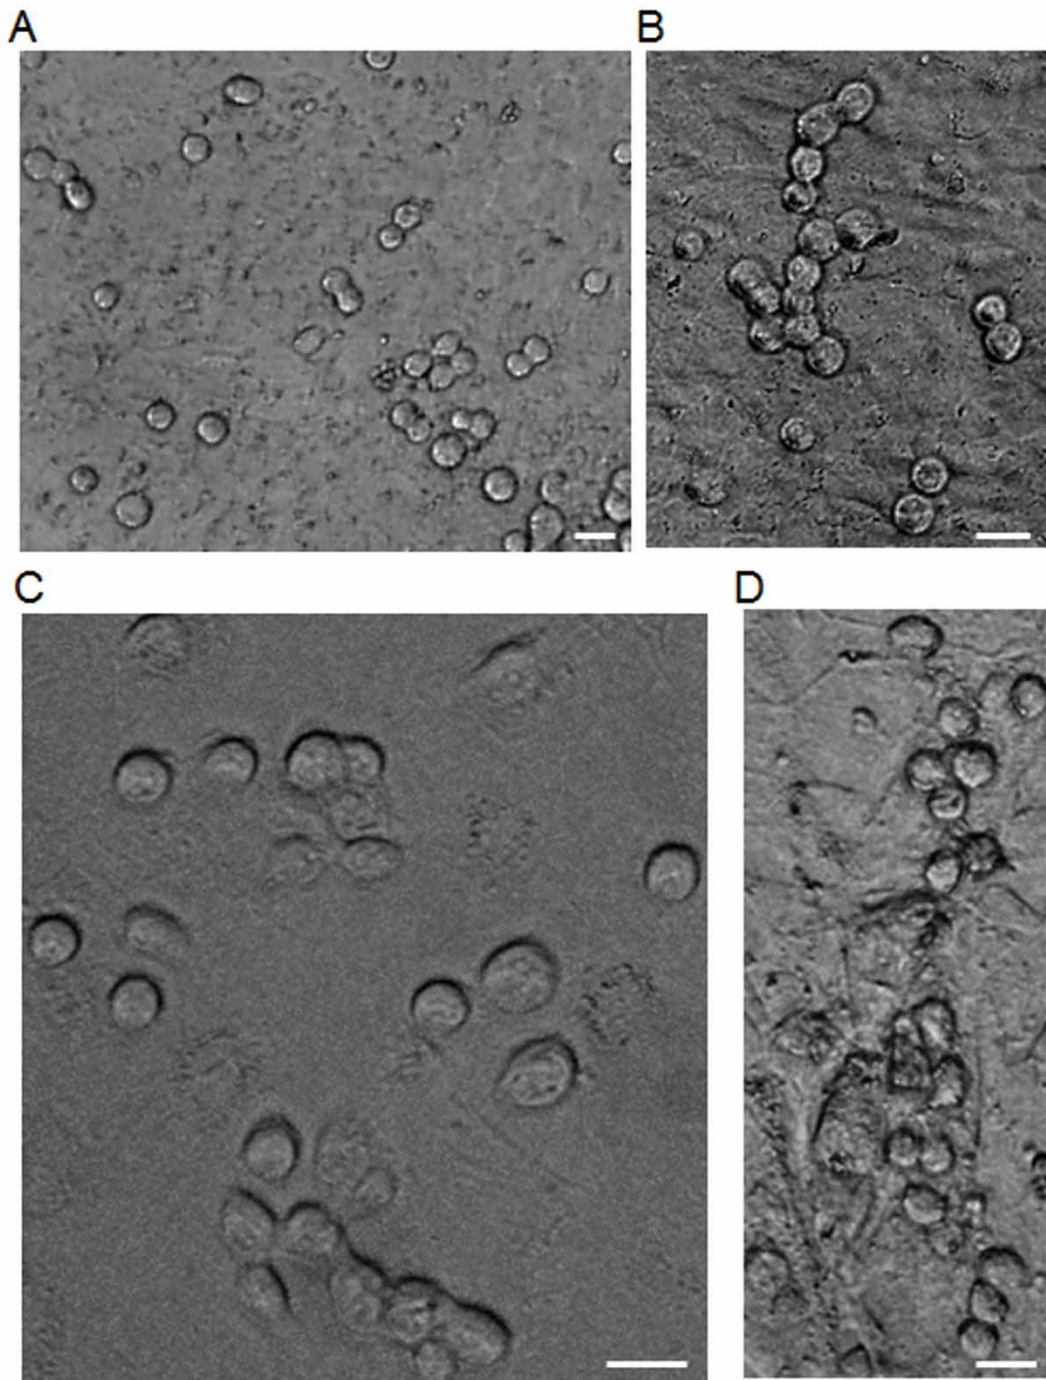

**Figure S1. Representative morphology of FGSCs from 8-day-old or 10-day-old mouse.** (A,B) FGSCs cultured for 3 days isolated from 8-day-old (A) and 10-day-old (B) mouse.(C,D) FGSCs cultured for 8 weeks isolated from 8-day-old (C) or 10-day-old (D) mouse. Scale bar, 20 μm.

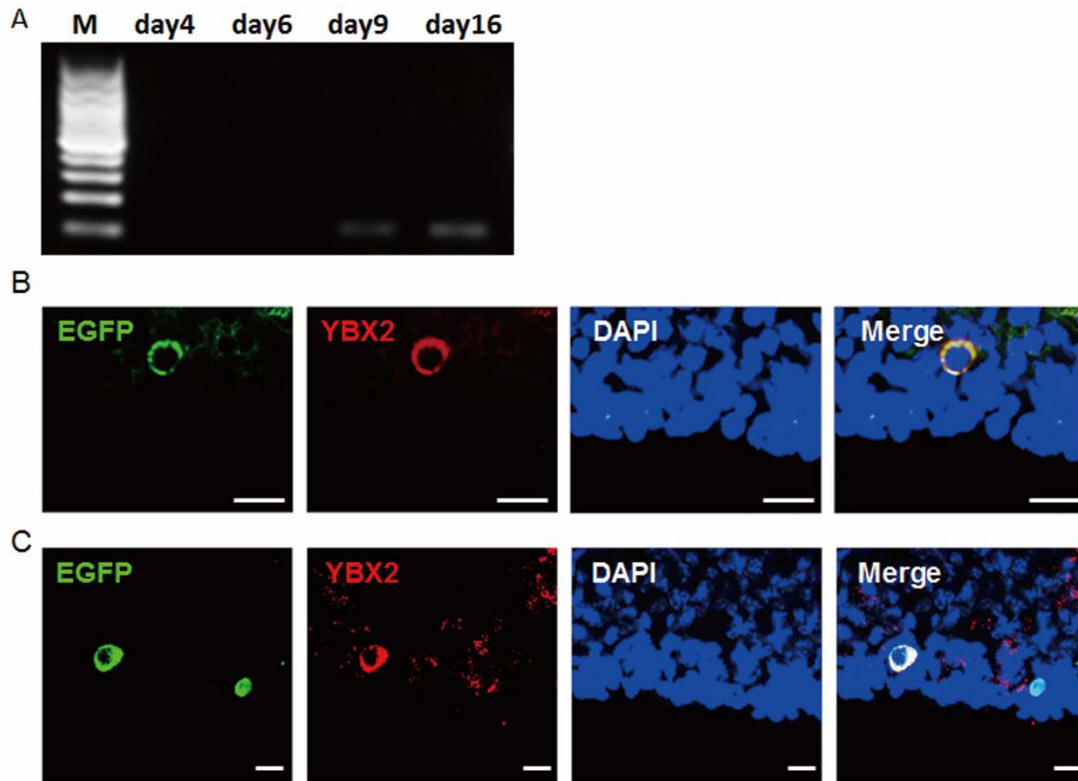

**Figure S2. The expression of YBX2.** (A) Ybx2 expression in single EGFP-positive FGSC on day 4, day 6, day 9 and day 16 post-transplantation. M: 100 bp DNA marker. (B,C) Immunofluorescence analysis of YBX2 and EGFP on day 9 (B) and day 16 (C) post-transplantation. Scale bar, 20  $\mu\text{m}$ .

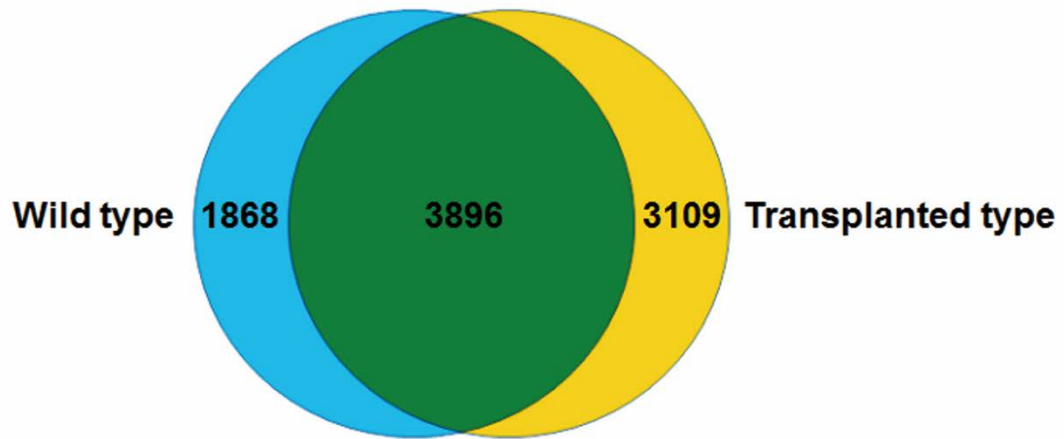

**Figure S3.** Venn diagram of differentially expressed genes (DEGs) during folliculogenesis between wild type and transplanted ovaries. In total, 3896 genes are the same DEGs in both ovaries.

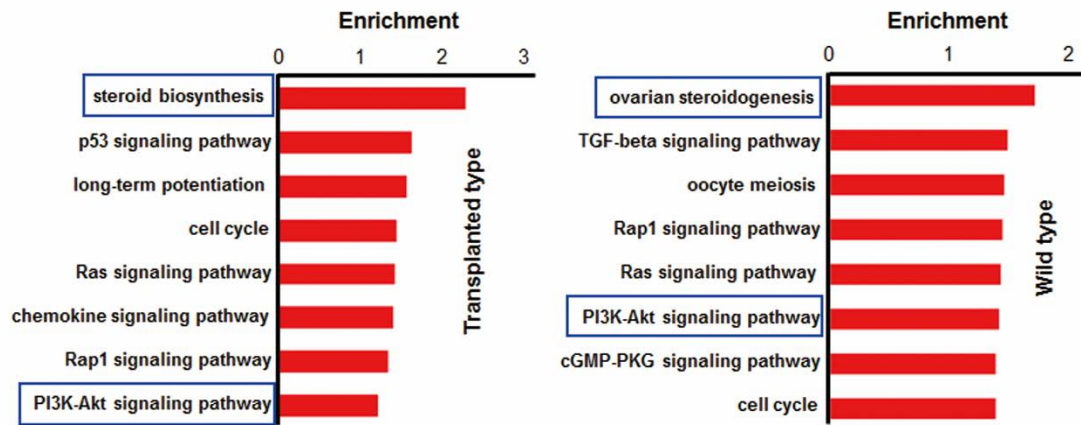

**Figure S4.** Pathway enrichment analysis of DEGs in transplanted and wild type ovaries ( $P$ -value  $< 0.05$ ). Blue boxes indicate steroid biosynthesis or ovarian steroidogenesis and PI3K-Akt signaling pathway, respectively.

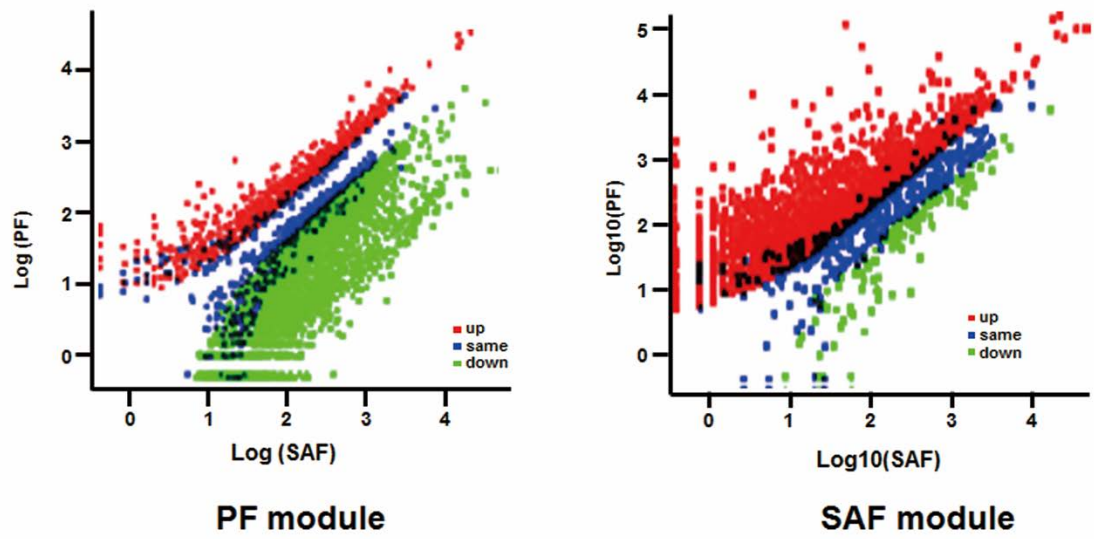

**Figure S5.** Scatter plot of FPKM in PF and SAF modules. Red, blue, and green dots represented up-, same-, and down-regulated genes, respectively.

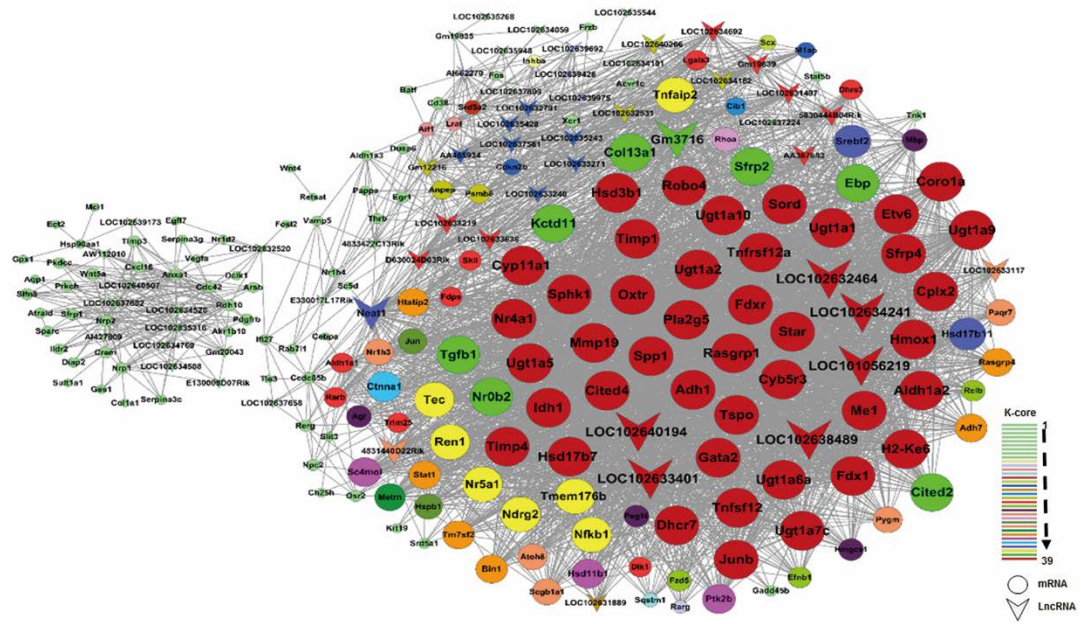

**Figure S6.** Gene co-expression network of SAF module. Color legend in bottom right corner indicates k-core values from 1 to 39. Cycle with color represents mRNA, and quadrangle with color represents lncRNA.

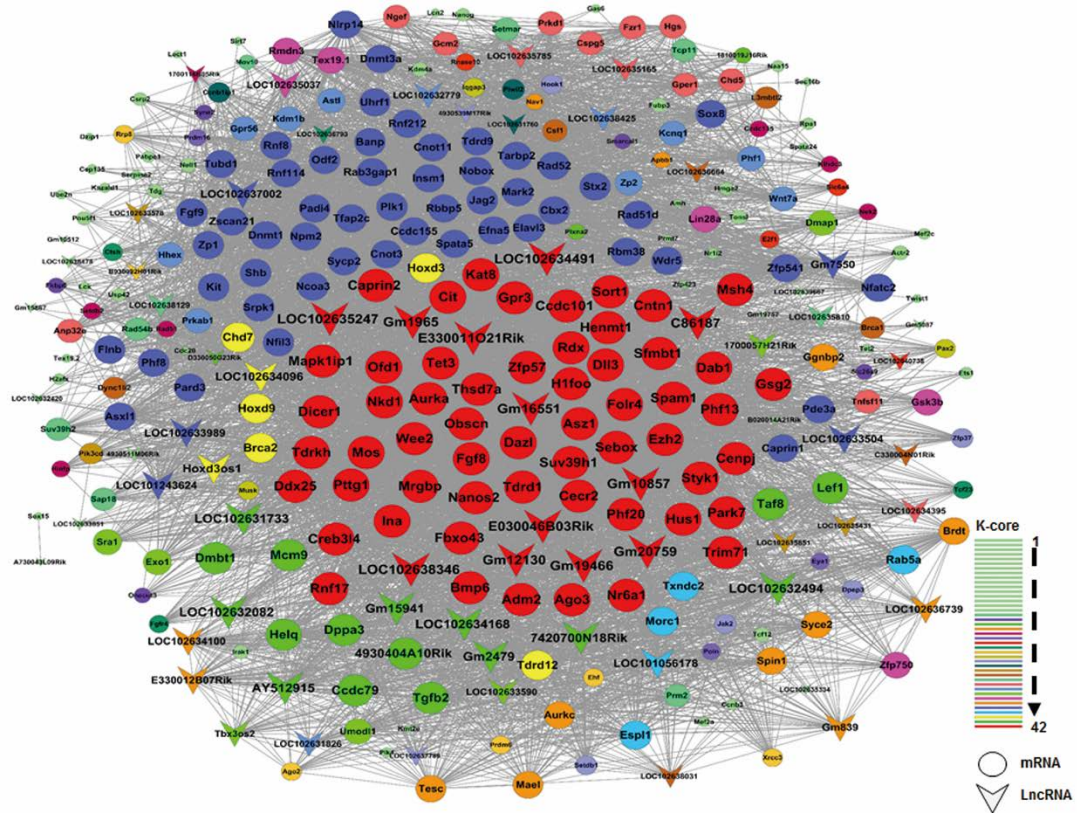

**Figure S7.** Gene co-expression network of PF module. Color legend in bottom right corner indicates k-core values from 1 to 42. Cycle with color represents mRNA, and quadrangle with color represents lncRNA.



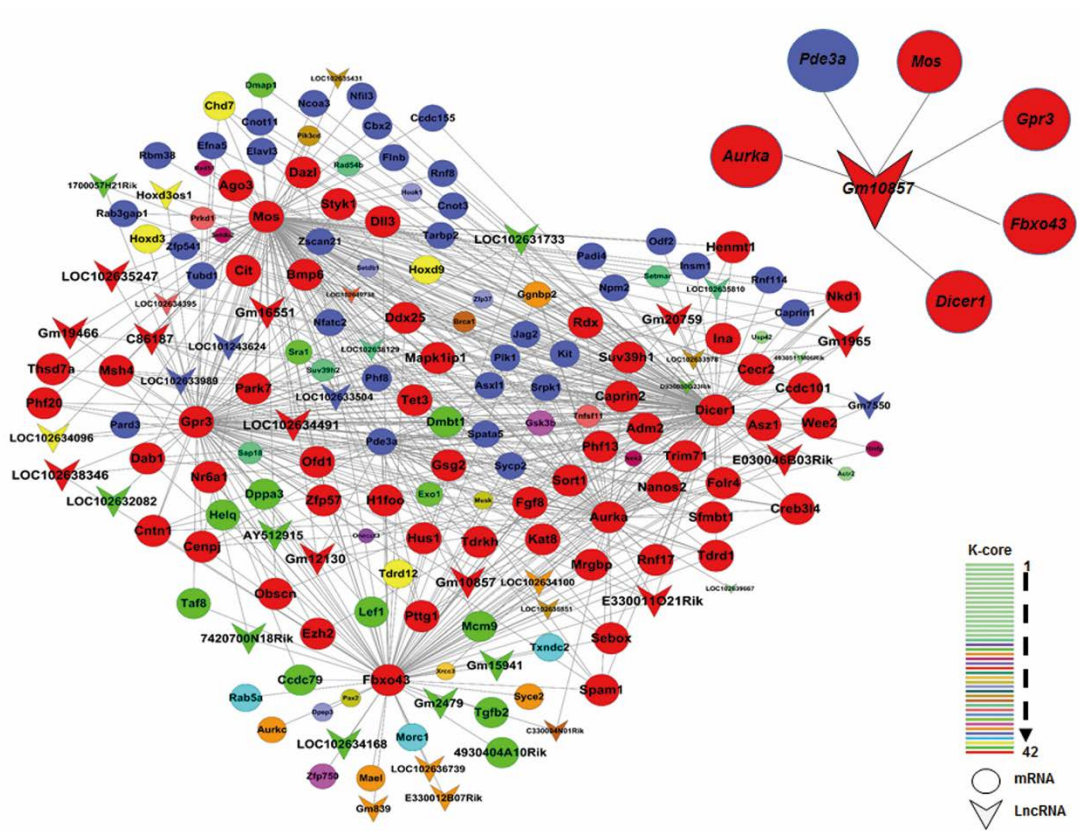

**Figure S8.** Sub-network consists of *Mos*, *Pde3a*, *Fbxo43*, *Gpr3*, *Aurka*, and *Dicer1* in the PF module. Top right image is potential network extracted from sub-network. Color legend in bottom right corner indicates k-core values from 1 to 42. Cycle with color represents mRNA, and quadrangle with color represents lncRNA.

Table S1. The fertility results using FGSCs isolated from different donor mouse.

| Group                  | POF recipient number | Recipient number that generated offspring |
|------------------------|----------------------|-------------------------------------------|
| Group A <sup>a</sup> . | 8                    | 6                                         |
| Group B <sup>a</sup> . | 8                    | 7                                         |
| Group C <sup>a</sup> . | 8                    | 5                                         |
| Group D <sup>a</sup> . | 8                    | 6                                         |
| Group E <sup>b</sup> . | 8                    | 0                                         |

<sup>a</sup>. FGSCs isolated from different donor mouse were used for transplantation.

<sup>b</sup>. The PBS was injected into each ovary for the control.

Table S3. Validation of gene expression specificity.

| Gene  | RNA-Seq data              |                       | qPCR data                 |                       |
|-------|---------------------------|-----------------------|---------------------------|-----------------------|
|       | SAF-TF/PF-TF <sup>a</sup> | FDR value             | SAF-TF/PF-TF <sup>a</sup> | P value               |
| BMP15 | 0.0058                    | 0.0000 <sup>***</sup> | 0.0065 ± 0.0003           | 0.0016 <sup>***</sup> |
| WEE2  | 0.0061                    | 0.0000 <sup>***</sup> | 0.0064 ± 0.0004           | 0.0022 <sup>***</sup> |
| AMH   | 0.0601                    | 0.0001 <sup>***</sup> | 0.0593 ± 0.0021           | 0.0011 <sup>***</sup> |
| NR5A1 | 1.3737                    | 0.0002 <sup>***</sup> | 1.1900 ± 0.0761           | 0.0084 <sup>*</sup>   |
| ASZ1  | 0.0093                    | 0.0000 <sup>***</sup> | 0.0096 ± 0.0013           | 0.0047 <sup>***</sup> |
| PDK4  | 1.4366                    | 0.0003 <sup>***</sup> | 1.3984 ± 0.0846           | 0.0025 <sup>***</sup> |
| ACTG2 | 8.0656                    | 0.0000 <sup>***</sup> | 7.4050 ± 0.1907           | 0.0006 <sup>***</sup> |

<sup>a</sup> the expression level is normalized to *Gapdh*. Data are the mean ± SD.

\*  $P < 0.05$ ; \*\*\*  $P < 0.005$  or  $FDR < 0.005$ , one-tail and two-sample T-test.

Table S5. Primers list.

| Gene                       | PCR primers <sup>a</sup>                                 | Product size                           |
|----------------------------|----------------------------------------------------------|----------------------------------------|
| <i>Cre</i> <sup>b</sup>    | F:TCTGATGAAGTCAGGAAGAACC<br>R:GAGATGTCCTTCACTCTGATTC     | 500bp                                  |
| <i>Pten</i> <sup>b</sup>   | F: AATTGAAAGCTCAGGGTAGC<br>R: ATCTGAACACTTCATCGGGA       | 551bp (wild type)<br>619bp (loxp type) |
| <i>DDx4</i> <sup>b</sup>   | F: GGAAACCAGCAGCAAGTGAT<br>R: TGGAGTCCTCATCCTCTGG        | 213bp                                  |
| <i>Dppa3</i> <sup>b</sup>  | F: CCCAATGAAGGACCCTGAAAC<br>R: AATGGCTCACTGTCCCGTTCA     | 354bp                                  |
| <i>Ifitm3</i> <sup>b</sup> | F:GTTATCACCATTGTTAGTGTCATC<br>R: AATGAGTGTTACACCTGCGTG   | 151bp                                  |
| <i>Pou5f1</i> <sup>b</sup> | F: AGCTGCTGAAGCAGAAGAGG<br>R: GGTTCTCATTGTTGTCGGCT       | 198bp                                  |
| <i>Dazl</i> <sup>b</sup>   | F: GTGTGTCGAAGGGCTATGGAT<br>R: ACAGGCAGCTGATATCCAGTG     | 328bp                                  |
| <i>Nanog</i> <sup>b</sup>  | F: CAGGAGTTTGAGGGTAGCTC<br>R: CGGTTTCATCATGGTACAGTC      | 223bp                                  |
| <i>Prdm1</i> <sup>b</sup>  | F: CGGAAAGCAACCCAAAGCAATAC<br>R: CCTCGGAACCATAGGAAACATTC | 483bp                                  |
| <i>Figla</i> <sup>b</sup>  | F: CCAAAGAGCGTGAACGGATAA<br>R: TCTTCCAGAACACAGCCGAGT     | 154bp                                  |

|                            |                                                         |       |
|----------------------------|---------------------------------------------------------|-------|
| <i>Kit</i> <sup>b</sup>    | F:CTGGTGGTTCAGAGTTCATAGAC<br>R:TCAACGACCTTCCCGAAGGCACCA | 401bp |
| <i>Sycp3</i> <sup>b</sup>  | F: GAGCCGCTGAGCAAACATCTA<br>R: ATATCCAGTTCCCCTGCTGC     | 437bp |
| <i>Zp3</i> <sup>b</sup>    | F: CCGAGCTGTGCAATTCCCAGA<br>R: AACCTCTGAGCCAAGGGTGA     | 183bp |
| <i>Gapdh</i> <sup>b</sup>  | F: GTCCCGTAGACAAAATGGTGA<br>R: TGCATTGCTGACAATCTTGAG    | 458bp |
| <i>Pou5f1</i> <sup>c</sup> | F: GGCTTCAGACTTCGCCTCC<br>R: AACCTGAGGTCCACAGTATGC      | 211bp |
| <i>Zp1</i> <sup>c</sup>    | F: CCCTGAGATTGGGTCAGCG<br>R:AGAGCAGTTATTCACCTCAAACC     | 164bp |
| <i>Zp2</i> <sup>c</sup>    | F: GTGGCAGAGGAAAGCATCTGT<br>R: GACTGAGGAAGGCTTACTGAGT   | 111bp |
| <i>eGfp</i> <sup>c</sup>   | F:CGACGGCAACTACAAGACCCG<br>R: ACGAACTCCAGCAGGACCATG     | 366bp |
| <i>Stra8</i> <sup>c</sup>  | F:ACAACCTAAGGAAGGCAGTTTAC<br>R: GACCTCCTCTAAGCTGTTGGG   | 173bp |
| <i>Sycp3</i> <sup>c</sup>  | F:AGCCAGTAACCAGAAAATTGAGC<br>R: CCACTGCTGCAACACATTCATA  | 106bp |
| <i>Dppa3</i> <sup>c</sup>  | F: GACCCAATGAAGGACCCTGAA<br>R: GCTTGACACCGGGGTTTAG      | 130bp |

|                           |                                                         |       |
|---------------------------|---------------------------------------------------------|-------|
| <i>Gapdh</i> <sup>c</sup> | F: AGGTCGGTGTGAACGGATTTG<br>R: TGTAGACCATGTAGTTGAGGTCA  | 123bp |
| <i>Ybx2</i> <sup>c</sup>  | F: GGAGTTTGTATGTCGTGGAAGG<br>R: CGTCGATTAGGGGCATAGCG    | 102bp |
| <i>Bmp15</i> <sup>d</sup> | F: TCCTTGCTGACGACCCTACAT<br>R: TACCTCAGGGGATAGCCTTGG    | 100bp |
| <i>Wee2</i> <sup>d</sup>  | F: ATGGCCGACACAGAGACTGA<br>R: GGCCTGAAACTGATTTCCAAAGA   | 247bp |
| <i>Nobox</i> <sup>d</sup> | F: ATGGAACCTACGGAGAAGCTC<br>R: CTCAGAGGTCTTCGACAGTGG    | 189bp |
| <i>Amh</i> <sup>d</sup>   | F: CCACACCTCTCTCCACTGGTA<br>R: GGCACAAAGGTTTCAGGGGG     | 151bp |
| <i>Nr5a1</i> <sup>d</sup> | F: CCCAAGAGTTAGTGCTCCAGT<br>R: CTGGGCGTCCTTTACGAGG      | 131bp |
| <i>Asz1</i> <sup>d</sup>  | F: CACGGCAGGGTCATAAAAATGT<br>R: CTCTTCTTTGGTTAGCTGCTGAA | 188bp |
| <i>Pdk4</i> <sup>d</sup>  | F: AGGGAGGTCGAGCTGTTCTC<br>R: GGAGTGTTCACTAAGCGGTCA     | 185bp |
| <i>Actg2</i> <sup>d</sup> | F: CCGCCCTAGACATCAGGGT<br>R: TCTTCTGGTGCTACTCGAAGC      | 192bp |
| <i>Gapdh</i> <sup>d</sup> | F: AGGTCGGTGTGAACGGATTTG<br>R: TGTAGACCATGTAGTTGAGGTCA  | 123bp |

<sup>a</sup>F, forward; R, reverse.

<sup>b</sup>Primers used for identification POF mouse and characterization of FGSCs.

<sup>c</sup>Primers used for single cell PCR.

<sup>d</sup>Primers used for validation the RNA-seq analysis.
